# Supplementary material for: Contrasted Epidemiological Patterns of West Nile Virus Lineages 1 and 2 Infections in France from 2015 to 2019
Source: PubMed Central journal article supplement (PMC7692118; doi:10.3390/pathogens9110908), 2020-10-30
Supplement: pathogens-09-00908-s001.pdf [file pathogens-09-00908-s001.pdf]

**Table S1:** Table presenting percentage homology in nucleotidic (nt, upper part) and in amino acid (aa, lower part) WNV sequences<sup>1</sup>.

|                                          | WNV-Akela<br>/France/2015,<br>MT863559 | WNV-405/04<br>/France/2004,<br>DQ786572 | WNV-PaAn001<br>/France/2000,<br>AY268132 | WNV-7025<br>/France/2018,<br>MT863561 | WNV-<br>Cremona4<br>/Italy/2014,<br>KP789957 |
|------------------------------------------|----------------------------------------|-----------------------------------------|------------------------------------------|---------------------------------------|----------------------------------------------|
| WNV-Akela<br>/France/2015,<br>MT863559   |                                        | 98,55%<br>(10760/10918)                 | 98,31%<br>(10737/10922)                  | 79,72%<br>(8749/10975)                | 79,79%<br>(8756/10974)                       |
| WNV-405/04<br>/France/2004,<br>DQ786572  | 99,59 %<br>(3420/3434)                 |                                         | 98,54%<br>(10779/10938)                  | 79,65%<br>(8752/10988)                | 79,72%<br>(8759/10987)                       |
| WNV-PaAn001<br>/France/2000,<br>AY268132 | 99,74 %<br>(3425/3434)                 | 99,62%<br>(3421/3434)                   |                                          | 79,54%<br>(8275/10403)                | 79,62%<br>(8282/10402)                       |
| WNV-7025<br>/France/2018,<br>MT863561    | 93,83%<br>(3223/3435)                  | 93,80%<br>(3222/3435)                   | 93,80%<br>(3222/3435)                    |                                       | 99,76%<br>(10969/10995)                      |
| WNV-Cremona4<br>/Italy/2014,<br>KP789957 | 93,97%<br>(3228/3435)                  | 93,94%<br>(3227/3435)                   | 93,94%<br>(3227/3435)                    | 99,76%<br>(3427/3435)                 |                                              |

aa homology

nt homology

<sup>1</sup>Whole-genome sequences of recent WNV isolates (WNV-Akela /France/2015 and WNV-7025 /France/2018) were compared to French and Italian complete genome sequences. Pairwise nucleotide and aa sequence alignment were performed with blastn and blastp respectively (<https://blast.ncbi.nlm.nih.gov/>).

**Table S2:** Amino acid substitutions identified between WNV-Akela/France/2015 and older French lineage 1 isolates

| AA position in the WNV polyprotein | Gene | WNV-Akela /France/2015, MT863559 | WNV-PaAn001 /France/2000, AY268132 | WNV-405/04 /France/2004, DQ786572 |
|------------------------------------|------|----------------------------------|------------------------------------|-----------------------------------|
| 100                                | C    | S                                | S                                  | L                                 |
| 119                                | C    | A                                | A                                  | T                                 |
| 158                                | prM  | I                                | I                                  | T                                 |
| 383                                | E    | K                                | R                                  | R                                 |
| 443                                | E    | G                                | G                                  | R                                 |
| 602                                | E    | L                                | L                                  | F                                 |
| 836                                | NS1  | I                                | V                                  | I                                 |
| 929                                | NS1  | P                                | P                                  | S                                 |
| 932                                | NS1  | K                                | K                                  | R                                 |
| 1271                               | NS2A | E                                | G                                  | E                                 |
| 1362                               | NS2A | V                                | A                                  | A                                 |
| 1749                               | NS3  | H                                | H                                  | Q                                 |
| 2008                               | NS3  | N                                | S                                  | N                                 |
| 2288                               | NS4B | R                                | S                                  | S                                 |
| 2532                               | NS5  | R                                | K                                  | K                                 |
| 2572                               | NS5  | K                                | R                                  | R                                 |
| 2902                               | NS5  | Y                                | Y                                  | H                                 |
| 3209                               | NS5  | T                                | I                                  | T                                 |
| Non synonymous mutations           |      |                                  | 9                                  | 14                                |

**Table S3:** Amino acid substitutions identified between lineage 2 WNV-7025/France/2018 and the closely genetically related WNV-Cremona4/Italy/2014

| AA position in the WNV polyprotein | Gene | WNV-Cremona4 /Italy/2014, KP789957 | WNV-7025 /France/2018, MT863561 |
|------------------------------------|------|------------------------------------|---------------------------------|
| 207                                | prM  | T                                  | P                               |
| 345                                | E    | D                                  | V                               |
| 883                                | NS1  | K                                  | E                               |
| 1340                               | NS2A | K                                  | X                               |
| 1726                               | NS3  | V                                  | I                               |
| 2557                               | NS5  | R                                  | K                               |
| 2801                               | NS5  | F                                  | L                               |
| 3322                               | NS5  | V                                  | A                               |
| non-synonymous mutations           |      | 8                                  |                                 |
